# Supplementary material
Source: PubMed Central journal article supplement (PMC4574953)
Supplement: NIHMS722296-supplement-supplement_1.pdf [file NIHMS722296-supplement-supplement_1.pdf]

**Supplemental Table 1. Incidence Rates of Hepatocellular Carcinoma, Decompensation, and Death among Patients not Tested for Hepatitis D - stratified by the presence of the High Risk profile\***

| Variable               | Total (N=4,929) | High Risk Profile (N=1,181) | No High Risk Profile (N=3,748) | IRR (95% CI) (High risk profile versus No High Risk Profile) | P-Value |
|------------------------|-----------------|-----------------------------|--------------------------------|--------------------------------------------------------------|---------|
| HCC                    | 6.9             | 10                          | 5.8                            | 1.7 (1.2-2.5)                                                | <0.001  |
| Hepatic Decompensation | 14              | 19                          | 12                             | 1.6 (1.2-2.0)                                                | <0.001  |
| Death                  | 41              | 47                          | 39                             | 1.2 (1.0-1.4)                                                | 0.006   |

Abbreviations: HCC=hepatocellular carcinoma

Incidence rates reported as cases per 1,000 person-years

\*High risk profile= ALT  $\geq$  2 ULN and HBV DNA < 2000 IU/mL

**Supplementary Table 2. Military service eras for HDV positive patients**

| Service Area | Number (%) |
|--------------|------------|
| Korean       | 1 (1.5)    |
| Persian Gulf | 4 (6.0)    |
| Post-vietnam | 19 (28)    |
| Vietnam      | 42 (63)    |
